# Supplementary material
Source: ML conference proceedings conference paper supplement (https://www.ecva.net/papers/eccv_2020/papers_ECCV/html/123630069_ECCV_2020_paper.php)
Supplement: Supplementary file 1 [file 123630069-supp.zip]

## Supplemental Materials: Finding Your (3D) Center

We will here give further details of our architecture. For simplicity we ignore batch dimensions. All branches for both `loss` and `scene` networks have a shared PointNet++ encoder shown in Tbl. 1 with input 4,096 and 32,768 respectively. We use the original “Single Scale Grouping” architecture from Qi et al. [1]. Unlike the original implementation no batch normalization, weight regularization or dropout layers are used. We define the implemented architectures in Tbl. 1 and Tbl. 2.

**Table 1.** PointNet++ encoder consisting of four “Set Abstraction” (SA) layers. Input is either 32,768 or 4,096 points for training `scene` or `loss` networks respectively. *Points* indicates the number of points selected from the farthest point sampling algorithm. *Samples* is the maximum points per neighborhood defined using a ball point query with radius  $r$ .

| Layer | MLP             | Points | Samples | Radius | Activation | Output Shape            |
|-------|-----------------|--------|---------|--------|------------|-------------------------|
| Input |                 |        |         |        |            | $(32768/4096) \times 3$ |
| SA    | [64, 64, 128]   | 1024   | 32      | 0.1    | ReLU       | $1024 \times 128$       |
| SA    | [64, 64, 128]   | 256    | 32      | 0.2    | ReLU       | $256 \times 128$        |
| SA    | [128, 128, 256] | 64     | 64      | 0.4    | ReLU       | $64 \times 256$         |
| SA    | [256, 512, 128] | None   | None    | None   | ReLU       | $1 \times 128$          |

Our *local* encoder is a 3 layer SSG network, which typically consists of half the number of units for each respective MLP layer.

**Table 2.** PointNet++ local encoder consisting of 3 SA layers. See Tbl. 1 caption for further details regarding columns.

| Layer | MLP             | Points | Samples | Radius | Activation | Output Shape     |
|-------|-----------------|--------|---------|--------|------------|------------------|
| Input |                 |        |         |        |            | $4096 \times 3$  |
| SA    | [32, 32, 64]    | 1024   | 32      | 0.1    | ReLU       | $256 \times 128$ |
| SA    | [64, 64, 128]   | 256    | 32      | 0.2    | ReLU       | $64 \times 256$  |
| SA    | [128, 128, 128] | None   | None    | None   | ReLU       | $1 \times 128$   |

Our loss network architecture has a shared PointNet++ encoder with three branches; gradient, property and objectness. Each branch consists of two fully-connected layers with a ReLU activation for the hidden layer. We use `softmax` for both single and multi-class examples. For single class where  $k = 2$  the first

class represents **empty** and the second class represents **present**. In a multi-class setting  $k$  is the number of classes. We do not have a **empty** class for multi-class. Both gradient and property branches do not have a final layer activation function.

**Table 3.** Loss network architecture. PNet++ is defined in Tbl. 1.

| Branch     | Layer  | Kernel       | Activation | Output Shape   |
|------------|--------|--------------|------------|----------------|
| Trunk      | PNet++ |              | ReLU       | $1 \times 128$ |
| Gradient   | FC     | $1 \times 1$ | ReLU       | $1 \times 512$ |
|            | FC     | $1 \times 1$ | None       | $1 \times 3$   |
| Property   | FC     | $1 \times 1$ | ReLU       | $1 \times 512$ |
|            | FC     | $1 \times 1$ | None       | $1 \times 5$   |
| Objectness | FC     | $1 \times 1$ | ReLU       | $1 \times 512$ |
|            | FC     | $1 \times 1$ | Softmax    | $1 \times k$   |

The *scene* network architecture is similar to the loss network but is designed for multiple proposals  $n$  as apposed to the loss network where  $n = 1$ . The property and objectness branches take patch codes generated by the local encoder. The patches are local crops from the center branch proposals. Note that the output of the PointNet++ encoder and local encoder are both  $1 \times 128$ . These latent codes are concatenated for input into the scene network property and objectness branches.

**Table 4.** Scene network architecture. PNet++ and PNet++ local are defined in Tbl. 1 and 2 respectively.

| Branch     | Layer          | Kernel       | Activation | Output Shape   |
|------------|----------------|--------------|------------|----------------|
| Trunk      | PNet++ encoder |              | ReLU       | $1 \times 128$ |
| Center     | FC             | $1 \times 1$ | ReLU       | $n \times 512$ |
|            | FC             | $1 \times 1$ | None       | $n \times 3$   |
| Property   | PNet++ local   | -            | ReLU       | $n \times 128$ |
|            | FC             | $1 \times 1$ | ReLU       | $n \times 512$ |
|            | FC             | $1 \times 1$ | None       | $n \times 5$   |
| Objectness | PNet++ local   | -            | ReLU       | $n \times 128$ |
|            | FC             | $1 \times 1$ | ReLU       | $n \times 512$ |
|            | FC             | $1 \times 1$ | Softmax    | $n \times k$   |

All network weights were initialized using the Glorot Normal initialization. We do not employ regularization or batch normalization in any of the networks.

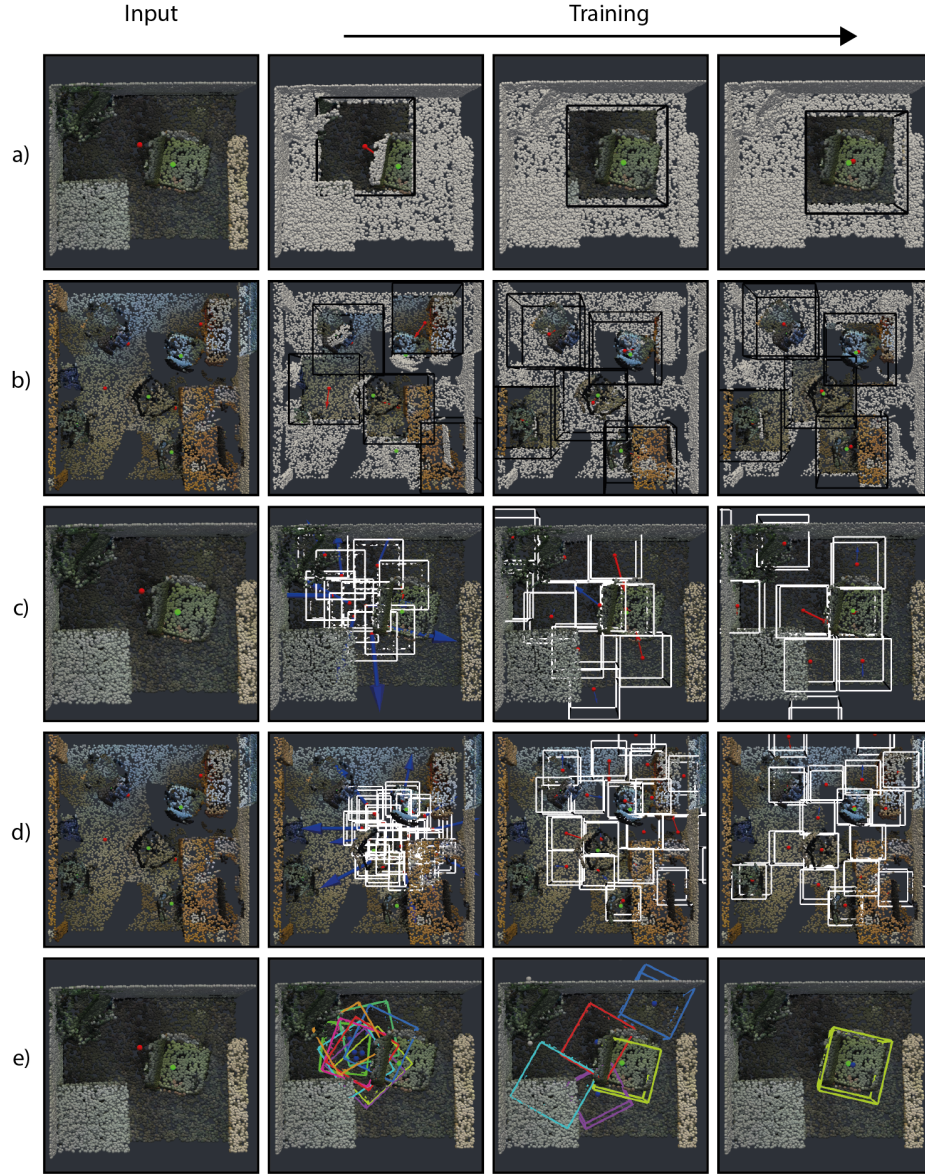

**Fig. 1.** Visualizations for the *scene network* during training. **a)** A scene consisting of a single proposal and single object. Colored points indicate those passed seen by the *loss network* for gradient estimation (red arrow). **b)** A scene consisting of 5 proposals and 5 objects. **c)** Here we show 10 proposals with 1 object. Our overlap penalty (blue arrow) is applied to all but the closest proposal to an object. **d)** 20 proposals with 5 objects. **e)** 10 proposals with 1 object. Here we visualize the final scene network output which consists of location, bounding box and orientation. Proposals with an objectness score below a threshold are shown as grey dots. For full video sequences visit the project page at: [dgriffiths3.github.io](https://dgriffiths3.github.io).

## Bibliography

- [1] Qi, C.R., Yi, L., Su, H., Guibas, L.J.: Pointnet++: Deep hierarchical feature learning on point sets in a metric space. arXiv:1706.02413 (2017)
